# Supplementary material for: Solution structures of alkali metal cyclopentadienides in THF estimated by ECC-DOSY NMR-spectroscopy (incl. software)
Source: Royal Society of Chemistry journal article supplement (doi:10.1039/c6cc07273a), 2016-01-01
Supplement: c6cc07273a1.pdf [file c6cc07273a1.pdf]

## SUPPORTING INFORMATION

### **Solution Structures of Alkali Metal Cyclopentadienides in THF estimated by ECC-DOSY NMR-Spectroscopy (incl. Software)**

*Sebastian Bachmann, Björn Gernert and Dietmar Stalke\**

Prof. Dr. D. Stalke, M. Sc. Sebastian Bachmann,  
Institut für Anorganische Chemie,  
Georg-August-Universität,  
Tammannstrasse 4,  
D-37077, Göttingen, Germany.

E-mail: [dstalke@chemie.uni-goettingen.de](mailto:dstalke@chemie.uni-goettingen.de)

M. Sc. Björn Gernert,  
Institut für Betriebssysteme und Rechnerverbund,  
TU Braunschweig,  
Mühlenpfordstrasse 23,  
D-38106, Braunschweig, Germany.

## Contents

|       |                                                                                                                                          |    |
|-------|------------------------------------------------------------------------------------------------------------------------------------------|----|
| I.    | Parameters and Methodology to Estimate Molecular Weights ( <i>MW</i> s) from DOSY.....                                                   | 3  |
| II.   | Preparation and NMR Assignment of Alkali Metal Cyclopentadienides (MCps).....                                                            | 5  |
| III.  | NMR Spectra .....                                                                                                                        | 7  |
| 1.    | Cyclopentadienyllithium (CpLi).....                                                                                                      | 7  |
| 2.    | Cyclopentadienylsodium (CpNa) .....                                                                                                      | 10 |
| 3.    | Cyclopentadienylpotassium (CpK).....                                                                                                     | 11 |
| 4.    | Cyclopentadienylrubidium (CpRb).....                                                                                                     | 12 |
| 5.    | Cyclopentadienylcesium (CpCs).....                                                                                                       | 13 |
| IV.   | <sup>1</sup> H- and <sup>7</sup> Li-DOSY-ECC- <i>MW</i> estimation of CpLi at 50, 25, –50 and –80 °C in THF- <i>d</i> <sub>8</sub> ..... | 14 |
| V.    | <sup>1</sup> H-DOSY-ECC- <i>MW</i> estimation of CpNa at 25 and –50 °C in THF- <i>d</i> <sub>8</sub> .....                               | 16 |
| VI.   | <sup>1</sup> H-DOSY-ECC- <i>MW</i> estimation of CpK at 25 in THF- <i>d</i> <sub>8</sub> .....                                           | 16 |
| VII.  | <sup>1</sup> H-DOSY-ECC- <i>MW</i> estimation of CpRb at 25 °C in THF- <i>d</i> <sub>8</sub> .....                                       | 17 |
| VIII. | <sup>1</sup> H-DOSY-ECC- <i>MW</i> estimation of CpCs at 25 and 50 °C in THF- <i>d</i> <sub>8</sub> .....                                | 17 |
| IX.   | Calculation of the molar van-der-Waals density <i>MD<sub>w</sub></i> .....                                                               | 18 |
| X.    | ECC- <i>MW</i> Estimation Software.....                                                                                                  | 19 |
| XI.   | References.....                                                                                                                          | 21 |

## I. Parameters and Methodology to Estimate Molecular Weights (MWs) from DOSY

Recently, our group could show that normalised logarithmic diffusion coefficients are independent of gradient and magnetic field strength, gradient pulse duration, and changes in temperature or viscosity. This creates comparability of diffusion coefficients and the creation of so called external calibration curves (ECCs) becomes possible, which will be explained herein. Equation (S1) was derived to normalise said diffusion coefficients:<sup>1</sup>

$$\log D_{x,norm} = \log D_{ref,fix} - \log D_{ref} + \log D_x \quad (\text{S1})$$

$\log D_{ref,fix}$  is the fixed logarithmic diffusion coefficient of the reference, which was estimated for the original references by using the middle diffusion coefficient of multiple DOSY measurements of 15 mM solutions at 25 °C,  $\log D_{ref}$  is the measured logarithmic diffusion coefficient of the reference,  $\log D_x$  the measured logarithmic diffusion coefficient of analyte (x) and  $\log D_{x,norm}$  the relative logarithmic diffusion coefficient of the analyte x normalised to the reference, which will be used in ECCs as well as estimation of MWs.

In this article we used 1,2,3,4-tetraphenylanthracene (TPhN) or 2,2,3,3-tetramethylbutane (TMB) as internal references with the following fixed diffusion coefficients in THF- $d_8$ :<sup>1</sup>

$$\begin{aligned} \log D_{ref,fix}(\text{TPhN}) &= -9.1054 \\ \log D_{ref,fix}(\text{TMB}) &= -8.7749 \end{aligned}$$

With equation (S2) it is possible to estimate MWs ( $MW_{det}$ ) with the help of ECC parameters ( $K$  and  $\alpha$ ) taken from our ECC establishing papers (see. Tab. S-1).<sup>1</sup> Most MWs were calculated with the ECCs for dissipated spheres and ellipsoidal (DSE) molecules, when no specific aggregate could be presented we used merged ECCs. Deuterated species diffuse like their protonated counterparts.<sup>2</sup>

$$MW_{det} = 10^{\left( \frac{\log D_{x,norm} - \log K}{\alpha} \right)} \quad (\text{S2})$$

Tab. S-1: Linear fit parameters for ECCs in THF- $d_8$ . We used all normalised diffusion coefficients given in literature<sup>1</sup> to redo the merged ECC and got different ECC parameters, which were then used in this study. In literature the merged ECC was generated by averaging the ECC parameters of all shape optimized ECCs.

|                     | $\log K$ | $\Delta \log K$ | $\alpha$ | $\Delta \alpha$ |
|---------------------|----------|-----------------|----------|-----------------|
| $ECC_{DSE}^{THF}$   | -7.54    | 0.0285          | -0.582   | 0.0124          |
| $ECC_{merge}^{THF}$ | -7.60    | 0.0407          | -0.553   | 0.0180          |

The accuracy of the ECCs are:  $MW_{dif} \leq \pm 9\%$  ( $ECC_{DSE}^{THF}$ ) and  $MW_{dif} \leq \pm 30\%$  ( $ECC_{merge}^{THF}$ ). The deviation is calculated by  $MW_{dif} = [(MW_{calc} - MW_{det}) / MW_{det}] \cdot 100\%$ , where  $MW_{det}$  is the experimentally determined and  $MW_{calc}$  the calculated molecular weight of a hypothetical aggregate.

Furthermore, the theoretical error limits have been calculated for the ECC-methodology via the following formulae (S3) and (S4). Formula (S3) has been derived through error propagation:

$$\Delta MW_{det} = \sqrt{\left(-\frac{MW_{det}}{D_{ref}\alpha} \cdot \Delta D_{ref}\right)^2 + \left(-\frac{MW_{det}}{K\alpha} \cdot \Delta K\right)^2 + \left(\frac{MW_{det}}{D_x\alpha} \cdot \Delta D_x\right)^2 + \left(\frac{MW_{det}}{D_{ref,fix}\alpha} \cdot \Delta D_{ref,fix}\right)^2 + \left(-\frac{MW_{det} \log\left(\frac{D_x D_{ref,fix}}{D_{ref} K}\right)}{\alpha^2} \cdot \Delta \alpha\right)^2} \quad (S3)$$

$$\Delta MW_{det,rel} = \frac{\Delta MW_{det}}{MW_{det}} \cdot 100\% \quad (S4)$$

Maximum deviations of logarithmic diffusion coefficients were around 0.075, which is approximately the width at half maximum of a DOSY signal. For all logarithmic diffusion coefficients an error of  $\Delta \log D$  of 0.015 (twice the mentioned deviations) was assumed. Theoretical errors are depending mostly on the linear fit parameters of the ECCs (listed further above; 99% of the final error), therefore utilizing individual errors for the diffusion coefficients did not seem necessary.

## II. Preparation and NMR Assignment of Alkali Metal Cyclopentadienides (MCps)

All preparations were performed in a dry and O<sub>2</sub>-free Ar atmosphere using Schlenk techniques.<sup>3</sup> Solvents were dried under reflux with appropriate drying agents in an Ar atmosphere. Dicyclopentadiene was purchased from Fluka and thermally cracked and distilled directly before use at 170 °C and ambient pressure (results in cyclopentadiene (CpH)). Other Chemicals were either purchased commercially or synthesised according to known literature procedures and stored under inert atmosphere. *n*Butyllithium (*n*BuLi) was kindly donated by Rockwood Lithium GmbH and was filtered through Celite® before use along with determination of the concentration.<sup>4</sup>

**Cyclopentadienyllithium** (CpLi) was prepared following a preparation route similar to *Olbrich's*<sup>5</sup> and *Wagner's*<sup>6</sup>. It was synthesised by lithiation of freshly distilled CpH (0.45 mL, 5.50 mmol, 1.16 eq.) with *n*BuLi (4.74 M in hexane, 1.00 mL, 4.74 mmol, 1.0 eq.) at 0 °C in THF (50 mL). The colorless reaction mixture was stirred for 10 h and after evaporation of the solvent CpLi was received as a white powder (0.34 g, 4.72 mmol, 99%) and dried *in vacuo*. For NMR measurements in NH<sub>3</sub>, gaseous NH<sub>3</sub> was introduced into the NMR tube for one minute at –78 °C; afterwards 0.1 mL of toluene-*d*<sub>8</sub> was added for referencing and after sealing the NMR tube spectra were recorded at 25 °C.

(THF-*d*<sub>8</sub>):

<sup>1</sup>H-NMR (400.13 MHz, THF-*d*<sub>8</sub>): δ = 5.69 (s, 5 H, 5 CH) ppm.

<sup>13</sup>C{<sup>1</sup>H}-NMR (100.62 MHz, THF-*d*<sub>8</sub>): δ = 103.4 (s, 5 C, 5 CH) ppm.

<sup>7</sup>Li-NMR (155.51 MHz, THF-*d*<sub>8</sub>): δ = –7.75 (s) ppm.

(NH<sub>3</sub>):

<sup>1</sup>H-NMR (400.13 MHz, NH<sub>3</sub>): δ = 5.89 (s, 5 H, 5 CH) ppm.

<sup>13</sup>C{<sup>1</sup>H}-NMR (100.62 MHz, NH<sub>3</sub>): δ = 104.1 (s, 5 C, 5 CH) ppm.

<sup>7</sup>Li-NMR (155.51 MHz, NH<sub>3</sub>): δ = –0.59 (s) ppm.

**Cyclopentadienylsodium** (CpNa) was prepared following a preparation route similar to *Olbrich's*<sup>5</sup>. It was synthesised by addition of freshly distilled CpH (0.90 mL, 10.8 mmol, 1.08 eq.) to a suspension of NaH (0.24 g, 10.0 mmol, 1.00 eq.) in Et<sub>2</sub>O (50 mL). The reaction mixture was stirred for 24 h and turned light pink in the process. After filtration, cyclopentane (10 mL) and pentane (20 mL) were added to the filtrate and the product was crystallised at –28 °C. The white crystals (0.64 g, 7.27 mmol, 73%) were filtered, washed with cold pentane and dried *in vacuo*.

(THF-*d*<sub>8</sub>):

<sup>1</sup>H-NMR (400.13 MHz, THF-*d*<sub>8</sub>): δ = 5.72 (s, 5 H, 5 CH) ppm.

<sup>13</sup>C{<sup>1</sup>H}-NMR (100.62 MHz, THF-*d*<sub>8</sub>): δ = 103.3 (s, 5 C, 5 CH) ppm.

<sup>23</sup>Na-NMR (105.84 MHz, THF-*d*<sub>8</sub>): δ = –28 to –31 (s<sub>br</sub>) ppm.

**Cyclopentadienylpotassium** (CpK) was prepared by addition of freshly distilled CpH (0.96 g, 14.5 mmol, 1.00 eq.) to a solution of freshly cut potassium (2.3 g, 58.8 mmol, 4.10 eq.) in Et<sub>2</sub>O (15 mL). After stirring the reaction mixture for 10 h and filtration of unreacted potassium, hexane (10 mL) was added. The product precipitated as a white solid (0.33 g, 3.17 mmol, 22%) and was filtered and dried *in vacuo*.

(THF-*d*<sub>8</sub>):

<sup>1</sup>H-NMR (400.13 MHz, THF-*d*<sub>8</sub>): δ = 5.63 (s, 5 H, 5 CH) ppm.

<sup>13</sup>C{<sup>1</sup>H}-NMR (100.62 MHz, THF-*d*<sub>8</sub>): Due to low solubility no resonance could be detected.

**Cyclopentadienylrubidium** (CpRb) was prepared by addition of freshly distilled CpH (0.06 mL, 0.73 mmol, 1.06 eq.) to a stirred and cooled (0 °C) solution of RbHMDS<sup>a</sup> (0.17 g, 0.69 mmol, 1.00 eq.) in THF (10 mL). After heating to ambient temperature and stirring for another hour, pentane (15 mL) was added. The product precipitated as a light brown solid (0.09 g, 0.60 mmol, 87%) and was filtered and dried *in vacuo*.

**(THF-*d*<sub>8</sub>):**

<sup>1</sup>H-NMR (400.13 MHz, THF-*d*<sub>8</sub>):  $\delta$  = 5.61 (s, 5 H, 5 CH) ppm.

<sup>13</sup>C{<sup>1</sup>H}-NMR (100.62 MHz, THF-*d*<sub>8</sub>): Due to low solubility no resonance could be detected.

**Cyclopentadienylcaesium** (CpCs) was prepared by addition of freshly distilled CpH (0.06 mL, 0.73 mmol, 1.06 eq.) to a stirred and cooled (0 °C) solution of CsHMDS<sup>a</sup> (0.20 g, 0.69 mmol, 1.00 eq.) in THF (10 mL). After heating to ambient temperature and stirring for another hour, pentane (15 mL) was added. The product precipitated as a light brown solid (0.11 g, 0.56 mmol, 81%) and was filtered and dried *in vacuo*.

**(THF-*d*<sub>8</sub>):**

<sup>1</sup>H-NMR (400.13 MHz, THF-*d*<sub>8</sub>):  $\delta$  = 5.55 (s, 5 H, 5 CH) ppm.

<sup>13</sup>C{<sup>1</sup>H}-NMR (100.62 MHz, THF-*d*<sub>8</sub>):  $\delta$  = 107.0 (s, 5 C, 5 CH) ppm.

<sup>133</sup>Cs-NMR (52.48 MHz, THF-*d*<sub>8</sub>):  $\delta$  = -240.1 (s) ppm.

---

<sup>a</sup> HMDS = hexamethyldisilazane (or Bis(trimethylsilyl)amine)

### III. NMR Spectra

#### 1. Cyclopentadienyllithium (CpLi)

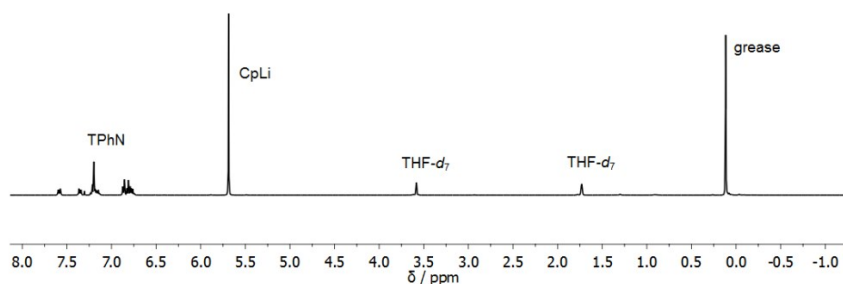

Fig. S-III-1:  $^1\text{H}$ -NMR spectrum of CpLi in  $\text{THF-}d_8$  at 25 °C.

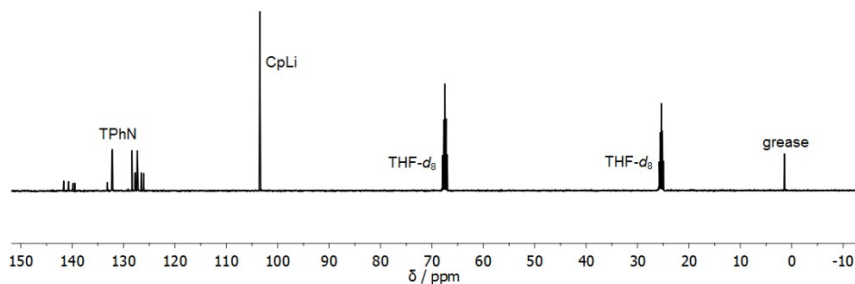

Fig. S-III-2:  $^{13}\text{C}$ [ $^1\text{H}$ ]-NMR spectrum of CpLi in  $\text{THF-}d_8$  at 25 °C.

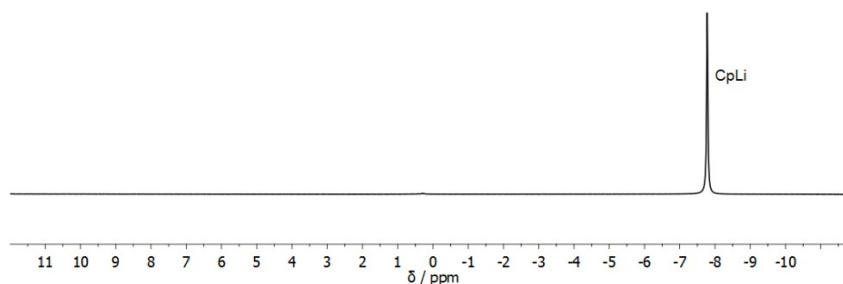

Fig. S-III-3:  $^7\text{Li}$ -NMR spectrum of CpLi in  $\text{THF-}d_8$  at 25 °C.

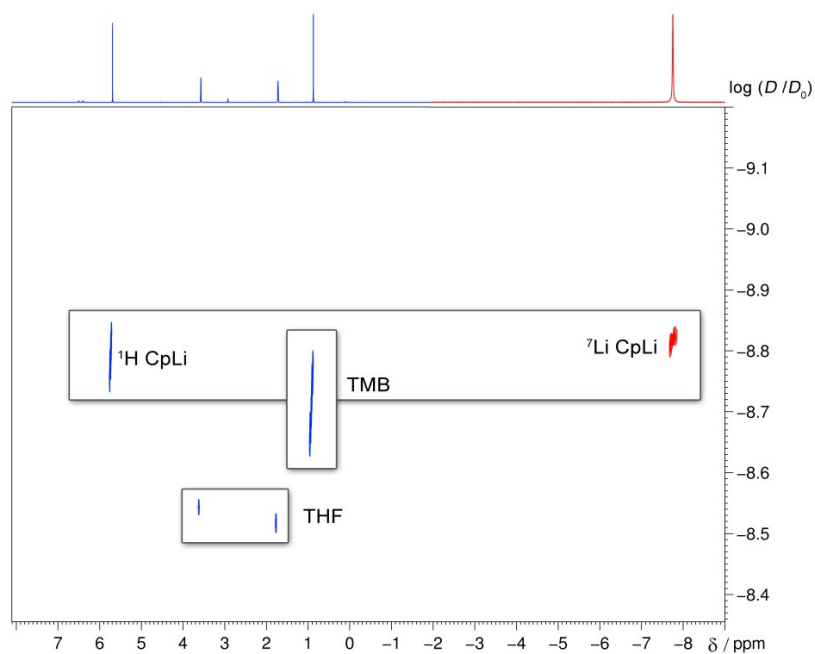

Fig. S-III-4: Superposition of  $^1\text{H}$ - (blue) and  $^7\text{Li}$ -DOSY-NMR (red) spectra of CpLi in  $\text{THF-}d_8$  at 25 °C. Since only 15 mm solutions were used, not all THF is coordinated to CpLi and the diffusion coefficient is averaged with “free” THF.

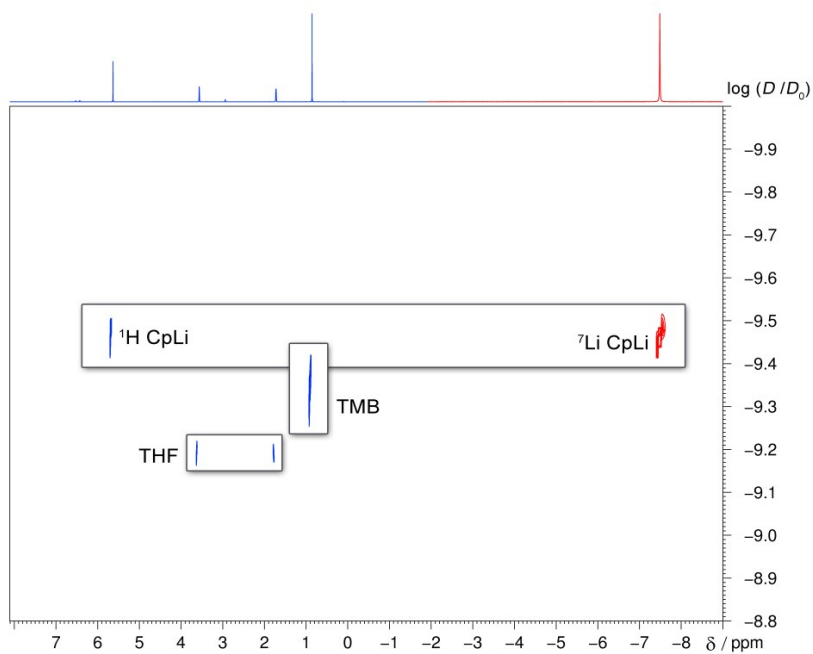

Fig. S-III-5: Superposition of  $^1\text{H}$ - (blue) and  $^7\text{Li}$ -DOSY-NMR (red) spectra of  $\text{CpLi}$  in  $\text{THF-d}_8$  at  $-50^\circ\text{C}$ . Since only 15 mM solutions were used, not all THF is coordinated to  $\text{CpLi}$  and the diffusion coefficient is averaged with “free” THF.

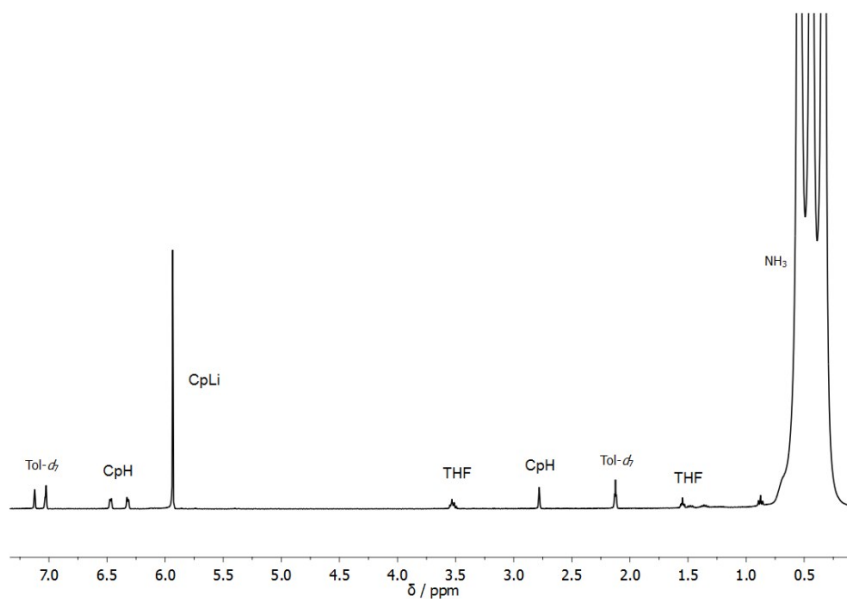

Fig. S-III-6:  $^1\text{H}$ -NMR spectrum of  $\text{CpLi}$  in  $\text{NH}_3$  with 0.1 mL  $\text{toluene-d}_8$  at  $25^\circ\text{C}$ .

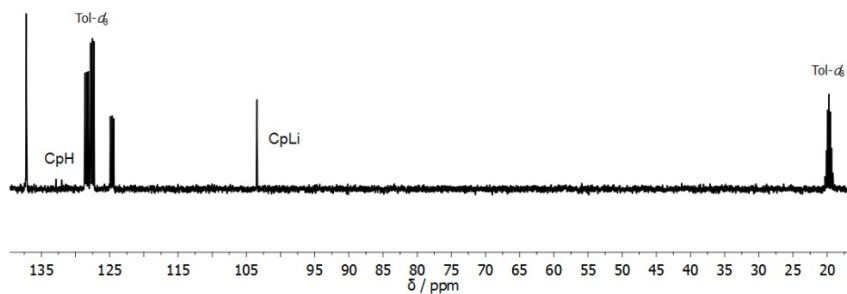

Fig. S-III-7:  $^{13}\text{C}\{^1\text{H}\}$ -NMR spectrum of  $\text{CpLi}$  in  $\text{NH}_3$  with 0.1 mL  $\text{toluene-d}_8$  at  $25^\circ\text{C}$ .



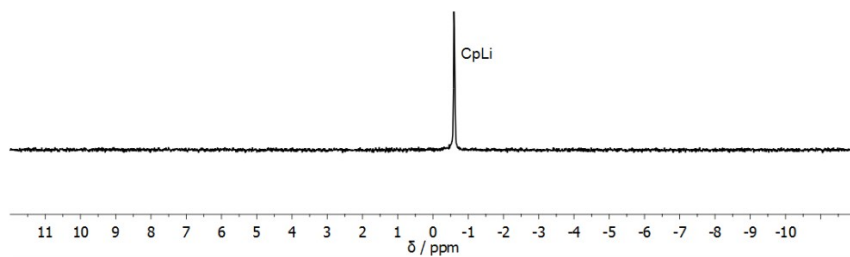

Fig. S-III-8:  $^7\text{Li}$ -NMR spectrum of CpLi in  $\text{NH}_3$  with 0.1 mL toluene- $d_8$  at 25 °C.

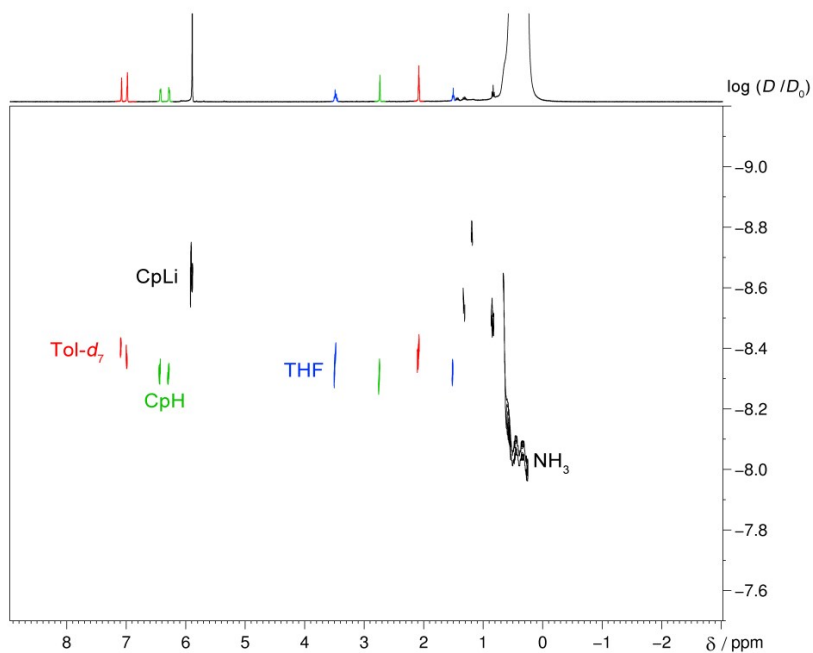

Fig. S-III-9:  $^1\text{H}$ -DOSY-NMR spectrum of CpLi in  $\text{NH}_3$  (with 0.1 mL toluene- $d_8$  (red)) at 25 °C. Cyclopentadiene (green) and THF (blue) remain from synthesis.

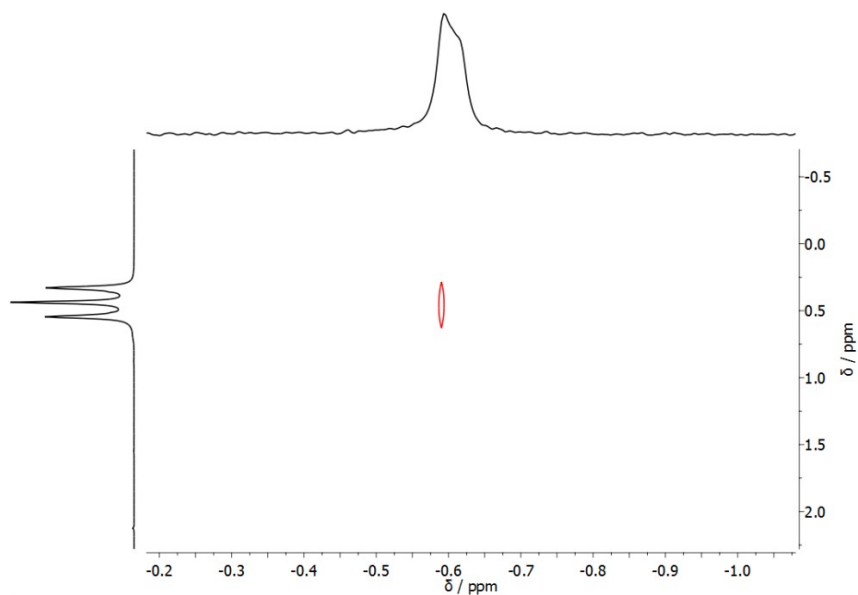

Fig. S-III-10: Excerpt of  $^7\text{Li}$ - $^1\text{H}$ -HOESY-NMR spectrum of CpLi in  $\text{NH}_3$  with 0.1 mL toluene- $d_8$  at 25 °C. Shows coupling between  $\text{NH}_3$  and lithium.

## 2. Cyclopentadienylsodium (CpNa)

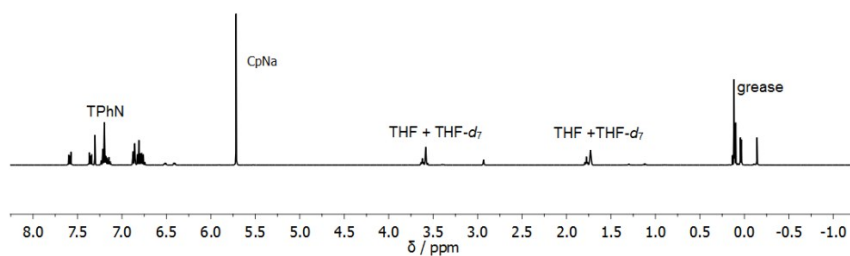

Fig. S-III-11:  $^1\text{H}$ -NMR spectrum of CpNa in  $\text{THF-}d_8$  at 25 °C.

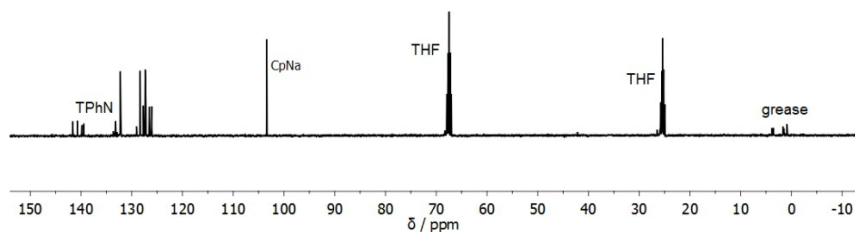

Fig. S-III-12:  $^{13}\text{C}\{^1\text{H}\}$ -NMR spectrum of CpNa in  $\text{THF-}d_8$  at 25 °C.

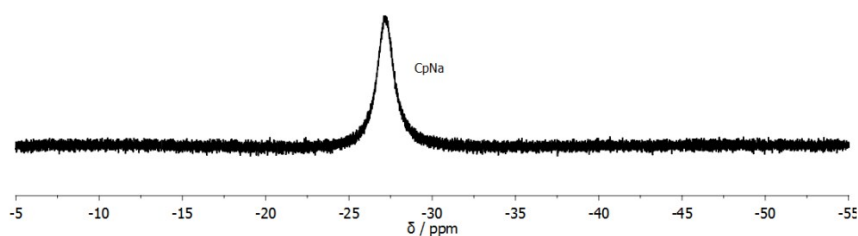

Fig. S-III-13:  $^{23}\text{Na}$ -NMR spectrum of CpNa in  $\text{THF-}d_8$  at 25 °C.

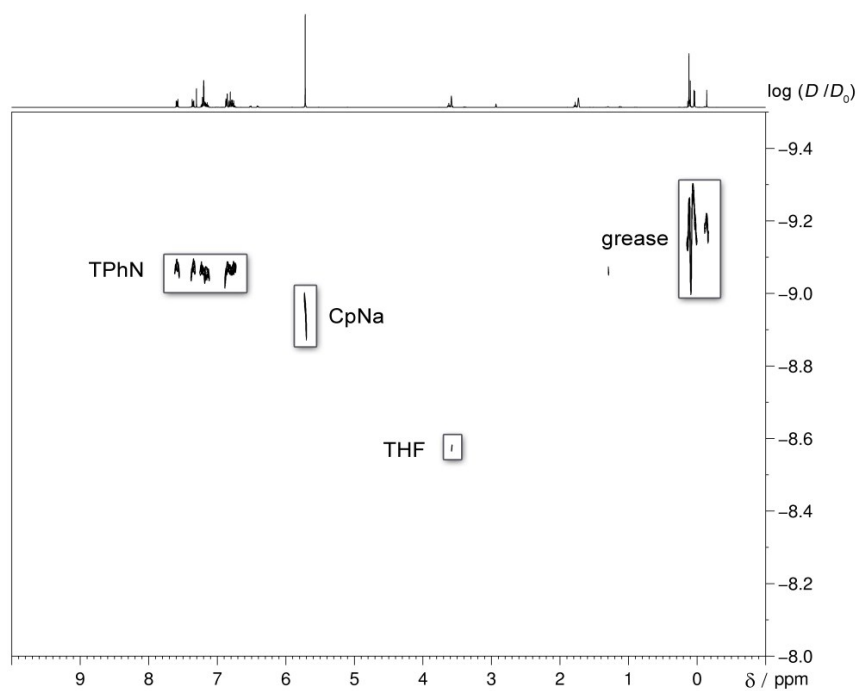

Fig. S-III-14:  $^1\text{H}$ -DOSY-NMR spectrum of CpNa in  $\text{THF-}d_8$  at 25 °C.

### 3. Cyclopentadienylpotassium (CpK)

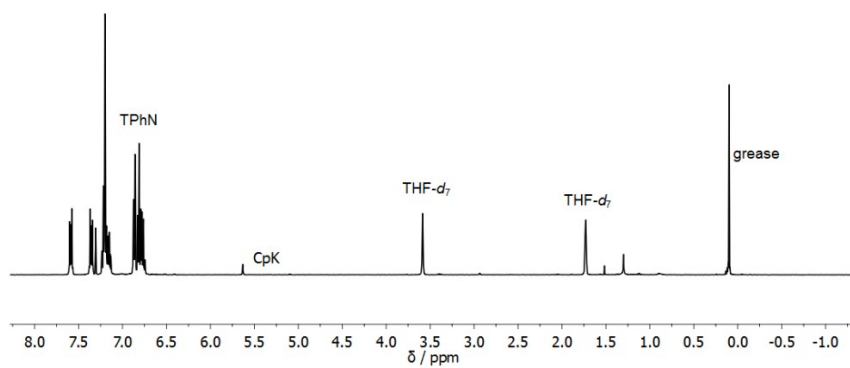

Fig. S-III-15:  $^1\text{H}$ -NMR spectrum of CpK in THF- $d_8$  at 25 °C.

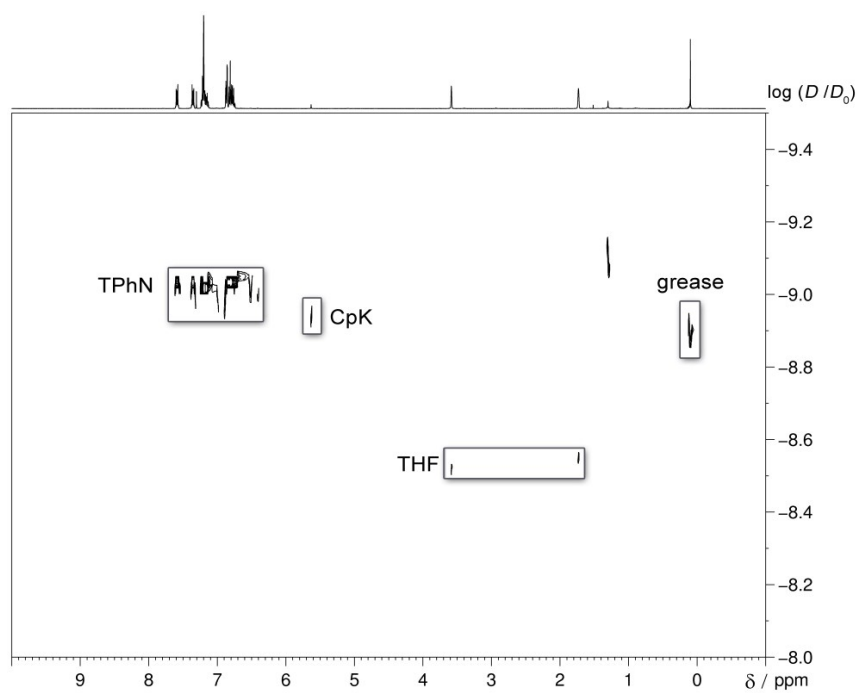

Fig. S-III-16:  $^1\text{H}$ -DOSY-NMR spectrum of CpK in THF- $d_8$  at 25 °C.

#### 4. Cyclopentadienylrubidium (CpRb)

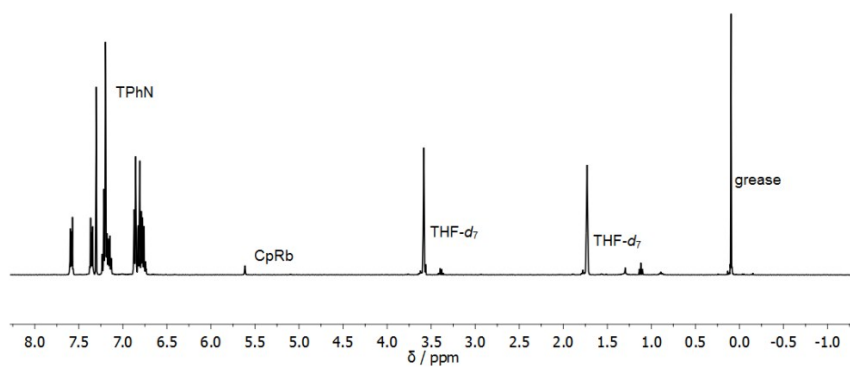

Fig. S-III-17:  $^1\text{H}$ -NMR spectrum of CpRb in  $\text{THF-}d_8$  at 25 °C.

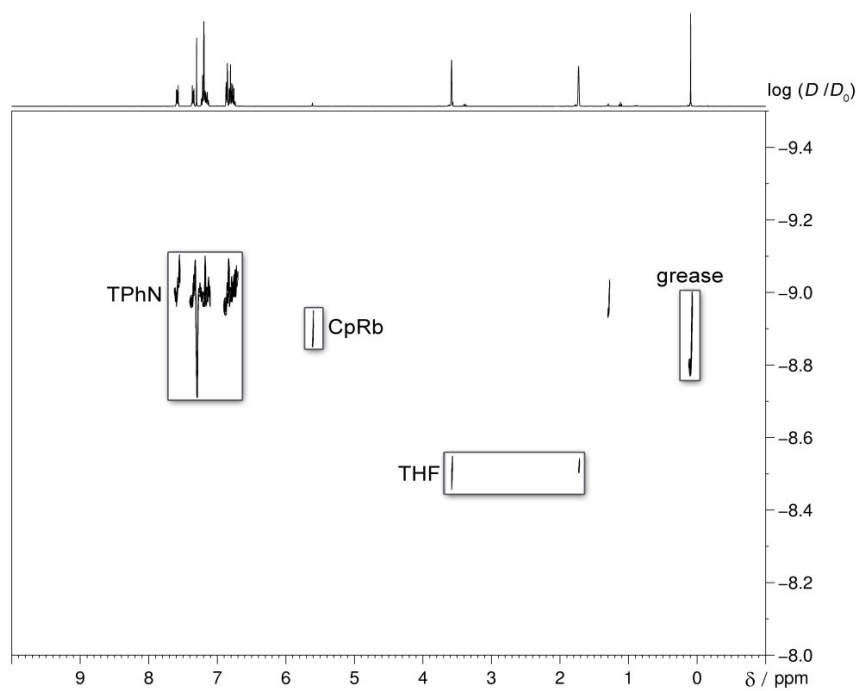

Fig. S-III-18:  $^1\text{H}$ -DOSY-NMR spectrum of CpRb in  $\text{THF-}d_8$  at 25 °C.

## 5. Cyclopentadienylcaesium (CpCs)

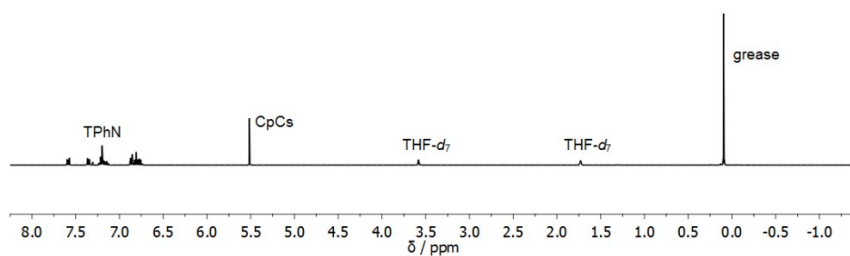

Fig. S-III-19:  $^1\text{H}$ -NMR spectrum of CpCs in THF- $d_8$  at 25 °C.

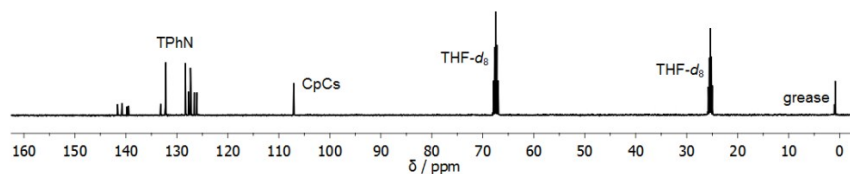

Fig. S-III-20:  $^{13}\text{C}\{^1\text{H}\}$ -NMR spectrum of CpCs in THF- $d_8$  at 25 °C.

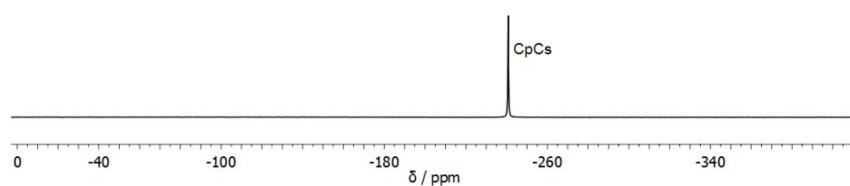

Fig. S-III-21:  $^{133}\text{Cs}$ -NMR spectrum of CpCs in THF- $d_8$  at 25 °C.

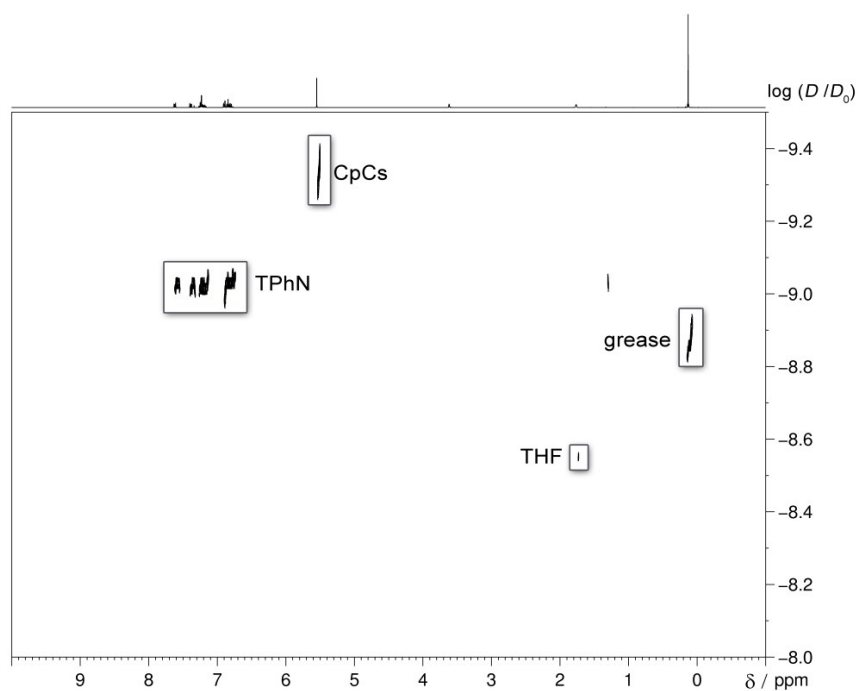

Fig. S-III-22:  $^1\text{H}$ -DOSY-NMR spectrum of CpCs in THF- $d_8$  at 25 °C.

#### IV. $^1\text{H}$ - and $^7\text{Li}$ -DOSY-ECC-MW estimation of CpLi at 50, 25, $-50$ and $-80$ °C in THF- $d_8$

Tab. S-2:  $^1\text{H}$ - and  $^7\text{Li}$ -DOSY-ECC-MW estimation of CpLi in THF- $d_8$  (15 mm) at different temperatures. TPhN or TMB were used as internal references with  $\log D_{\text{ref,fix}}(\text{TPhN}) = -9.1054$  or  $\log D_{\text{ref,fix}}(\text{TMB}) = -8.7749$ . The accuracy of this method (DSE ECC) is in the range of  $MW_{\text{dif}} \leq \pm 9\%$ . Hypothetical aggregates are  $[\text{CpLi} \cdot \text{THF}_x]$  (li1a to li1d) and  $[(\text{CpLi})_2 \cdot \text{THF}_x]$  (li2a to li2d) with  $a-d = x = 1-4$ . A trend is visible towards higher MWs and diffusion coefficients upon cooling, indicating the formation of a  $[\text{Cp}_2\text{Li}]^-$  species proposed by Paquette *et al.*<sup>7</sup>, but these changes are within the standard deviation of a DOSY signal and we therefore propose the monomeric aggregate to be dominating. Still, note that li1a has a similar MW as  $[\text{Cp}_2\text{Li}]^-$ , li1b as  $[\text{Cp}_2\text{Li} \cdot \text{THF}]^-$  and so on.

| <sup>1</sup> H-DOSY                        |           |           | 50 °C                      |                       |
|--------------------------------------------|-----------|-----------|----------------------------|-----------------------|
|                                            |           | Aggregate | MW <sub>calc</sub> [g/mol] | MW <sub>dif</sub> [%] |
| D <sub>x</sub> [m <sup>2</sup> /s]         | 2.175E−09 | li1a      | 144                        | −30                   |
| logD <sub>x</sub>                          | −8.6625   | li1b      | 216                        | 5                     |
| logD <sub>x,norm</sub>                     | −8.8855   | li1c      | 288                        | 41                    |
| D <sub>ref</sub> (TMB) [m <sup>2</sup> /s] | 2.806E−09 | li1d      | 360                        | 76                    |
| logD <sub>ref</sub> (TMB)                  | −8.5519   | li2a      | 216                        | 5                     |
| MW <sub>det</sub> [g/mol]                  | 205       | li2b      | 288                        | 41                    |
| ΔMW <sub>det</sub> [g/mol] (%)             | ±10 (5)   | li2c      | 360                        | 76                    |
|                                            |           | li2d      | 432                        | 111                   |

| <sup>1</sup> H-DOSY                         |           |           | 25 °C                      |                       |
|---------------------------------------------|-----------|-----------|----------------------------|-----------------------|
|                                             |           | Aggregate | MW <sub>calc</sub> [g/mol] | MW <sub>dif</sub> [%] |
| D <sub>x</sub> [m <sup>2</sup> /s]          | 1.407E−09 | li1a      | 144                        | −34                   |
| logD <sub>x</sub>                           | −8.8517   | li1b      | 216                        | −1                    |
| logD <sub>x,norm</sub>                      | −8.9012   | li1c      | 288                        | 32                    |
| D <sub>ref</sub> (TPhN) [m <sup>2</sup> /s] | 8.791E−09 | li1d      | 360                        | 65                    |
| logD <sub>ref</sub> (TPhN)                  | −9.0559   | li2a      | 216                        | −1                    |
| MW <sub>det</sub> [g/mol]                   | 218       | li2b      | 288                        | 32                    |
| ΔMW <sub>det</sub> [g/mol] (%)              | ±11 (5)   | li2c      | 360                        | 65                    |
|                                             |           | li2d      | 432                        | 98                    |

| <sup>1</sup> H-DOSY                        |           |           | −50 °C                     |                       |
|--------------------------------------------|-----------|-----------|----------------------------|-----------------------|
|                                            |           | Aggregate | MW <sub>calc</sub> [g/mol] | MW <sub>dif</sub> [%] |
| D <sub>x</sub> [m <sup>2</sup> /s]         | 3.381E−10 | li1a      | 144                        | −35                   |
| logD <sub>x</sub>                          | −9.4710   | li1b      | 216                        | −2                    |
| logD <sub>x,norm</sub>                     | −8.9050   | li1c      | 288                        | 30                    |
| D <sub>ref</sub> (TMB) [m <sup>2</sup> /s] | 4.562E−10 | li1d      | 360                        | 63                    |
| logD <sub>ref</sub> (TMB)                  | −9.3408   | li2a      | 216                        | −2                    |
| MW <sub>det</sub> [g/mol]                  | 222       | li2b      | 288                        | 30                    |
| ΔMW <sub>det</sub> [g/mol] (%)             | ±11 (5)   | li2c      | 360                        | 63                    |
|                                            |           | li2d      | 432                        | 95                    |

| <sup>1</sup> H-DOSY                        |           |           | −80 °C                     |                       |
|--------------------------------------------|-----------|-----------|----------------------------|-----------------------|
|                                            |           | Aggregate | MW <sub>calc</sub> [g/mol] | MW <sub>dif</sub> [%] |
| D <sub>x</sub> [m <sup>2</sup> /s]         | 1.144E−10 | li1a      | 144                        | −36                   |
| logD <sub>x</sub>                          | −9.9416   | li1b      | 216                        | −4                    |
| logD <sub>x,norm</sub>                     | −8.9090   | li1c      | 288                        | 28                    |
| D <sub>ref</sub> (TMB) [m <sup>2</sup> /s] | 1.558E−10 | li1d      | 360                        | 60                    |
| logD <sub>ref</sub> (TMB)                  | −9.8074   | li2a      | 216                        | −4                    |
| MW <sub>det</sub> [g/mol]                  | 225       | li2b      | 288                        | 28                    |
| ΔMW <sub>det</sub> [g/mol] (%)             | ±11 (5)   | li2c      | 360                        | 60                    |
|                                            |           | li2d      | 432                        | 92                    |

| <sup>1</sup> H-DOSY   |  |  | −100 °C |  |
|-----------------------|--|--|---------|--|
| No interpretable data |  |  |         |  |

| <sup>7</sup> Li-DOSY                       |           |           |                            | 50 °C                 |
|--------------------------------------------|-----------|-----------|----------------------------|-----------------------|
|                                            |           | Aggregate | MW <sub>calc</sub> [g/mol] | MW <sub>dif</sub> [%] |
| $D_x$ [m <sup>2</sup> /s]                  | 2.085E−09 | li1a      | 144                        | −35                   |
| $\log D_x$                                 | −8.6809   | li1b      | 216                        | −2                    |
| $\log D_{x,\text{norm}}$                   | −8.9039   | li1c      | 288                        | 31                    |
| $D_{\text{ref}}$ (TMB) [m <sup>2</sup> /s] | 2.806E−09 | li1d      | 360                        | 63                    |
| $\log D_{\text{ref}}$ (TMB)                | −8.5519   | li2a      | 216                        | −2                    |
| MW <sub>det</sub> [g/mol]                  | 221       | li2b      | 288                        | 31                    |
| $\Delta MW_{\text{det}}$ [g/mol] (%)       | ±11 (5)   | li2c      | 360                        | 63                    |
|                                            |           | li2d      | 432                        | 96                    |

  

| <sup>7</sup> Li-DOSY                       |           |           |                            | 25 °C                 |
|--------------------------------------------|-----------|-----------|----------------------------|-----------------------|
|                                            |           | Aggregate | MW <sub>calc</sub> [g/mol] | MW <sub>dif</sub> [%] |
| $D_x$ [m <sup>2</sup> /s]                  | 1.519E−09 | li1a      | 144                        | −30                   |
| $\log D_x$                                 | −8.8184   | li1b      | 216                        | 5                     |
| $\log D_{x,\text{norm}}$                   | −8.8874   | li1c      | 288                        | 40                    |
| $D_{\text{ref}}$ (TMB) [m <sup>2</sup> /s] | 1.968E−09 | li1d      | 360                        | 74                    |
| $\log D_{\text{ref}}$ (TMB)                | −8.7060   | li2a      | 216                        | 5                     |
| MW <sub>det</sub> [g/mol]                  | 207       | li2b      | 288                        | 40                    |
| $\Delta MW_{\text{det}}$ [g/mol] (%)       | ±10 (5)   | li2c      | 360                        | 74                    |
|                                            |           | li2d      | 432                        | 109                   |

  

| <sup>7</sup> Li-DOSY                       |           |           |                            | −50 °C                |
|--------------------------------------------|-----------|-----------|----------------------------|-----------------------|
|                                            |           | Aggregate | MW <sub>calc</sub> [g/mol] | MW <sub>dif</sub> [%] |
| $D_x$ [m <sup>2</sup> /s]                  | 3.369E−10 | li1a      | 144                        | −35                   |
| $\log D_x$                                 | −9.4724   | li1b      | 216                        | −3                    |
| $\log D_{x,\text{norm}}$                   | −8.9066   | li1c      | 288                        | 29                    |
| $D_{\text{ref}}$ (TMB) [m <sup>2</sup> /s] | 4.562E−10 | li1d      | 360                        | 62                    |
| $\log D_{\text{ref}}$ (TMB)                | −9.3408   | li2a      | 216                        | −3                    |
| MW <sub>det</sub> [g/mol]                  | 223       | li2b      | 288                        | 29                    |
| $\Delta MW_{\text{det}}$ [g/mol] (%)       | ±11 (5)   | li2c      | 360                        | 62                    |
|                                            |           | li2d      | 432                        | 94                    |

  

| <sup>7</sup> Li-DOSY  |  |  |  | −80 °C & −100 °C |
|-----------------------|--|--|--|------------------|
| No interpretable data |  |  |  |                  |

## V. $^1\text{H}$ -DOSY-ECC-MW estimation of CpNa at 25 and $-50\text{ }^\circ\text{C}$ in THF- $d_8$

Tab. S-3:  $^1\text{H}$ -DOSY-ECC-MW estimation of CpNa in THF- $d_8$  (15 mm) at different temperatures. TPhN or TMB were used as internal references with  $\log D_{\text{ref,fix}}(\text{TPhN}) = -9.1054$  or  $\log D_{\text{ref,fix}}(\text{TMB}) = -8.7749$ . The accuracy of this method (DSE ECC) is in the range of  $MW_{\text{dif}} \leq \pm 9\%$ . Hypothetical aggregates are  $[\text{CpNa} \cdot \text{THF}_x]$  (na1a to na1d) and  $[(\text{CpNa})_2 \cdot \text{THF}_x]$  (na2a to na2d) with a-d = x = 1-4.

| $^1\text{H}$ -DOSY                                      |              | 25 $^\circ\text{C}$ |                            |                       |
|---------------------------------------------------------|--------------|---------------------|----------------------------|-----------------------|
|                                                         |              | Aggregate           | $MW_{\text{calc}}$ [g/mol] | $MW_{\text{dif}}$ [%] |
| $D_x$ [ $\text{m}^2/\text{s}$ ]                         | 1.120E-09    | na1a                | 160                        | -46                   |
| $\log D_x$                                              | -8.9508      | na1b                | 232                        | -21                   |
| $\log D_{x,\text{norm}}$                                | -8.9778      | na1c                | 304                        | 3                     |
| $D_{\text{ref}}(\text{TPhN})$ [ $\text{m}^2/\text{s}$ ] | 8.3483E-09   | na1d                | 376                        | 27                    |
| $\log D_{\text{ref}}(\text{TPhN})$                      | -9.0784      | na2a                | 248                        | -16                   |
| $MW_{\text{det}}$ [g/mol]                               | 295          | na2b                | 320                        | 8                     |
| $\Delta MW_{\text{det}}$ [g/mol] (%)                    | $\pm 16$ (5) | na2c                | 392                        | 33                    |
|                                                         |              | na2d                | 464                        | 57                    |

---

| $^1\text{H}$ -DOSY                                     |              | $-50\text{ }^\circ\text{C}$ |                            |                       |
|--------------------------------------------------------|--------------|-----------------------------|----------------------------|-----------------------|
|                                                        |              | Aggregate                   | $MW_{\text{calc}}$ [g/mol] | $MW_{\text{dif}}$ [%] |
| $D_x$ [ $\text{m}^2/\text{s}$ ]                        | 2.817E-10    | na1a                        | 160                        | -44                   |
| $\log D_x$                                             | -9.5502      | na1b                        | 232                        | -19                   |
| $\log D_{x,\text{norm}}$                               | -8.9705      | na1c                        | 304                        | 6                     |
| $D_{\text{ref}}(\text{TMB})$ [ $\text{m}^2/\text{s}$ ] | 4.420E-10    | na1d                        | 376                        | 31                    |
| $\log D_{\text{ref}}(\text{TMB})$                      | -9.3546      | na2a                        | 248                        | -14                   |
| $MW_{\text{det}}$ [g/mol]                              | 287          | na2b                        | 320                        | 12                    |
| $\Delta MW_{\text{det}}$ [g/mol] (%)                   | $\pm 15$ (5) | na2c                        | 392                        | 37                    |
|                                                        |              | na2d                        | 464                        | 62                    |

## VI. $^1\text{H}$ -DOSY-ECC-MW estimation of CpK at 25 in THF- $d_8$

Tab. S-4:  $^1\text{H}$ -DOSY-ECC-MW estimation of CpK in THF- $d_8$  (15 mm) at 25  $^\circ\text{C}$ . TPhN was used as internal references with  $\log D_{\text{ref,fix}}(\text{TPhN}) = -9.1054$ . The accuracy of this method (DSE ECC) is in the range of  $MW_{\text{dif}} \leq \pm 9\%$ . Hypothetical aggregates are  $[\text{CpK} \cdot \text{THF}_x]$  (k1a to k1d) and  $[(\text{CpK})_2 \cdot \text{THF}_x]$  (k2a to k2d) with a-d = x = 1-4.

| $^1\text{H}$ -DOSY                                      |              | 25 $^\circ\text{C}$ |                            |                       |
|---------------------------------------------------------|--------------|---------------------|----------------------------|-----------------------|
|                                                         |              | Aggregate           | $MW_{\text{calc}}$ [g/mol] | $MW_{\text{dif}}$ [%] |
| $D_x$ [ $\text{m}^2/\text{s}$ ]                         | 1.136E-09    | k1a                 | 176                        | -47                   |
| $\log D_x$                                              | -8.9446      | k1b                 | 248                        | -26                   |
| $\log D_{x,\text{norm}}$                                | -9.0098      | k1c                 | 320                        | -4                    |
| $D_{\text{ref}}(\text{TPhN})$ [ $\text{m}^2/\text{s}$ ] | 9.116E-09    | k1d                 | 392                        | 17                    |
| $\log D_{\text{ref}}(\text{TPhN})$                      | -9.0402      | k2a                 | 280                        | -16                   |
| $MW_{\text{det}}$ [g/mol]                               | 335          | k2b                 | 353                        | 5                     |
| $\Delta MW_{\text{det}}$ [g/mol] (%)                    | $\pm 18$ (5) | k2c                 | 425                        | 27                    |
|                                                         |              | k2d                 | 497                        | 48                    |



## VII. $^1\text{H}$ -DOSY-ECC-MW estimation of CpRb at 25 °C in THF- $d_8$

Tab. S-5:  $^1\text{H}$ -DOSY-ECC-MW estimation of CpRb in THF- $d_8$  (15 mm) at 25 °C. TPhN was used as internal references with  $\log D_{\text{ref,fix}}(\text{TPhN}) = -9.1054$ . The accuracy of this method (DSE ECC) is in the range of  $MW_{\text{dif}} \leq \pm 9\%$ . Hypothetical aggregates are  $[\text{CpRb} \cdot \text{THF}_x]$  (rb1a to rb1d) and  $[(\text{CpRb})_2 \cdot \text{THF}_x]$  (rb2a to rb2d) with  $a-d = x = 1-4$ .

| $^1\text{H}$ -DOSY                                |              |           | 25 °C                      |                       |
|---------------------------------------------------|--------------|-----------|----------------------------|-----------------------|
|                                                   |              | Aggregate | $MW_{\text{calc}}$ [g/mol] | $MW_{\text{dif}}$ [%] |
| $D_x$ [ $\text{m}^2/\text{s}$ ]                   | 1.272E-09    | rb1a      | 223                        | -24                   |
| $\log D_x$                                        | -8.8955      | rb1b      | 295                        | 0                     |
| $\log D_{x,\text{norm}}$                          | -8.9770      | rb1c      | 367                        | 25                    |
| $D_{\text{ref}}$ (TPhN) [ $\text{m}^2/\text{s}$ ] | 9.4637E-09   | rb1d      | 439                        | 49                    |
| $\log D_{\text{ref}}$ (TPhN)                      | -9.0239      | rb2a      | 373                        | 27                    |
| $MW_{\text{det}}$ [g/mol]                         | 294          | rb2b      | 445                        | 51                    |
| $\Delta MW_{\text{det}}$ [g/mol] (%)              | $\pm 16$ (5) | rb2c      | 517                        | 76                    |
|                                                   |              | rb2d      | 589                        | 100                   |

## VIII. $^1\text{H}$ -DOSY-ECC-MW estimation of CpCs at 25 and 50 °C in THF- $d_8$

Tab. S-6:  $^1\text{H}$ -DOSY-ECC-MW estimation of CpCs in THF- $d_8$  (15 mm) at different temperatures. TPhN or TMB were used as internal references with  $\log D_{\text{ref,fix}}(\text{TPhN}) = -9.1054$  or  $\log D_{\text{ref,fix}}(\text{TMB}) = -8.7749$ . The accuracy of this method (merged ECC) is in the range of  $MW_{\text{dif}} \leq \pm 18\%$ . Exemplary hypothetical aggregates are  $[(\text{CpCs})_5 \cdot \text{THF}_{10}]$  (cs5j) or  $[(\text{CpCs})_6 \cdot \text{THF}_{12}]$  (cs6l), while other combinations may also be viable.

| $^1\text{H}$ -DOSY                               |                |           | 50 °C                      |                       |
|--------------------------------------------------|----------------|-----------|----------------------------|-----------------------|
|                                                  |                | Aggregate | $MW_{\text{calc}}$ [g/mol] | $MW_{\text{dif}}$ [%] |
| $D_x$ [ $\text{m}^2/\text{s}$ ]                  | 6.201E-09      | cs5j      | 1710                       | -8                    |
| $\log D_x$                                       | -9.2076        | cs6l      | 2053                       | 10                    |
| $\log D_{x,\text{norm}}$                         | -9.4085        |           |                            |                       |
| $D_{\text{ref}}$ (TMB) [ $\text{m}^2/\text{s}$ ] | 2.667E-09      |           |                            |                       |
| $\log D_{\text{ref}}$ (TMB)                      | -8.5740        |           |                            |                       |
| $MW_{\text{det}}$ [g/mol]                        | 1863           |           |                            |                       |
| $\Delta MW_{\text{det}}$ [g/mol] (%)             | $\pm 199$ (11) |           |                            |                       |

  

| $^1\text{H}$ -DOSY                                |                |           | 25 °C                      |                       |
|---------------------------------------------------|----------------|-----------|----------------------------|-----------------------|
|                                                   |                | Aggregate | $MW_{\text{calc}}$ [g/mol] | $MW_{\text{dif}}$ [%] |
| $D_x$ [ $\text{m}^2/\text{s}$ ]                   | 4.595E-10      | cs5j      | 1710                       | -8                    |
| $\log D_x$                                        | -9.3377        | cs6l      | 2053                       | 11                    |
| $\log D_{x,\text{norm}}$                          | -9.4072        |           |                            |                       |
| $D_{\text{ref}}$ (TPhN) [ $\text{m}^2/\text{s}$ ] | 9.211E-09      |           |                            |                       |
| $\log D_{\text{ref}}$ (TPhN)                      | -9.0357        |           |                            |                       |
| $MW_{\text{det}}$ [g/mol]                         | 1855           |           |                            |                       |
| $\Delta MW_{\text{det}}$ [g/mol] (%)              | $\pm 198$ (11) |           |                            |                       |

## IX. Calculation of the molar van-der-Waals density $MD_w$

The ECC-MW estimation works best with molecules that have a molar van-der-Waals density (see equation S3) between  $MD_w = 4.3 \cdot 10^{29} \text{ g}/(\text{mol} \cdot \text{m}^3)$  and  $MD_w = 5.9 \cdot 10^{29} \text{ g}/(\text{mol} \cdot \text{m}^3)$ . If  $MD_w$  is bigger than  $5.9 \cdot 10^{29} \text{ g}/(\text{mol} \cdot \text{m}^3)$ , like for example for CpRb, CpCs or [CpCs · THF] then the determined MW would be underestimated, if the proposed aggregate would be estimated with ECC-DOSY.<sup>1</sup> We just listed calculations for monomeric species with 1 and 4 eq. of THF. All in between fit as well. For dimeric compounds only CpCs without THF would be underestimated.

Tab. S-7: Calculation of the molar van-der-Waals densities  $MD_w$

|                            | Formula    | MW  | C  | H  | O | Li | Na | K | Rb | Cs | $MD_w$<br>[g/(mol · m <sup>3</sup> ) ] | $\Sigma V_w$<br>[m <sup>3</sup> ] |
|----------------------------|------------|-----|----|----|---|----|----|---|----|----|----------------------------------------|-----------------------------------|
| CpLi                       | C5H5Li     | 72  | 5  | 5  | 0 | 1  | 0  | 0 | 0  | 0  | 4.61E+29                               | 1.56E-29                          |
| CpNa                       | C5H5Na     | 88  | 5  | 5  | 0 | 0  | 1  | 0 | 0  | 0  | 4.90E+29                               | 1.80E-29                          |
| CpK                        | C5H5K      | 104 | 5  | 5  | 0 | 0  | 0  | 1 | 0  | 0  | 4.77E+29                               | 2.18E-29                          |
| CpRb                       | C5H5Rb     | 151 | 5  | 5  | 0 | 0  | 0  | 0 | 1  | 0  | 6.23E+29                               | 2.42E-29                          |
| CpCs                       | C5H5Cs     | 198 | 5  | 5  | 0 | 0  | 0  | 0 | 0  | 1  | 6.60E+29                               | 3.00E-29                          |
| [CpLi · THF]               | C9H13LiO   | 144 | 9  | 13 | 1 | 1  | 0  | 0 | 0  | 0  | 4.84E+29                               | 2.98E-29                          |
| [CpNa · THF]               | C9H13NaO   | 160 | 9  | 13 | 1 | 0  | 1  | 0 | 0  | 0  | 4.98E+29                               | 3.21E-29                          |
| [CpK · THF]                | C9H13KO    | 176 | 9  | 13 | 1 | 0  | 0  | 1 | 0  | 0  | 4.90E+29                               | 3.60E-29                          |
| [CpRb · THF]               | C9H13RbO   | 223 | 9  | 13 | 1 | 0  | 0  | 0 | 1  | 0  | 5.81E+29                               | 3.84E-29                          |
| [CpCs · THF]               | C9H13CsO   | 270 | 9  | 13 | 1 | 0  | 0  | 0 | 0  | 1  | 6.12E+29                               | 4.41E-29                          |
| [CpLi · THF <sub>4</sub> ] | C21H37LiO4 | 360 | 21 | 37 | 4 | 1  | 0  | 0 | 0  | 0  | 4.98E+29                               | 7.23E-29                          |
| [CpNa · THF <sub>4</sub> ] | C21H37NaO4 | 376 | 21 | 37 | 4 | 0  | 1  | 0 | 0  | 0  | 5.04E+29                               | 7.46E-29                          |
| [CpK · THF <sub>4</sub> ]  | C21H37KO4  | 392 | 21 | 37 | 4 | 0  | 0  | 1 | 0  | 0  | 5.00E+29                               | 7.84E-29                          |
| [CpRb · THF <sub>4</sub> ] | C21H37RbO4 | 439 | 21 | 37 | 4 | 0  | 0  | 0 | 1  | 0  | 5.43E+29                               | 8.09E-29                          |
| [CpCs · THF <sub>4</sub> ] | C21H37CsO4 | 486 | 21 | 37 | 4 | 0  | 0  | 0 | 0  | 1  | 5.61E+29                               | 8.66E-29                          |

$$MD_w = \frac{MW}{\sum V_w} = MW / \sum_{i=1}^n \frac{3}{4} \pi r_{w,i}^3 \quad (\text{S3})$$

Tab. S-8: Van-der-Waals volumina of selected elements.<sup>8</sup>

| Element | $V_w$ [m <sup>3</sup> ] |
|---------|-------------------------|
| H       | 5.575E-30               |
| Li      | 2.525E-29               |
| C       | 2.058E-29               |
| Na      | 4.900E-29               |
| K       | 8.711E-29               |
| O       | 1.471E-29               |
| Rb      | 1.117E-28               |
| Cs      | 1.690E-28               |

## X. ECC-MW Estimation Software

To simplify the ECC-MW estimation process, minimize the possibility for errors and make the methodology more accessible: We developed a simple piece of software to apply and choose all current and up-coming ECC-MW estimation techniques. The software is available for download at:

<http://www.stalke.chemie.uni-goettingen.de/mwestimation/>

To achieve a maximum system interoperability the software was implemented in Oracle's object-oriented programming language "Java". Java uses a so called Java virtual machine (JVM), which is able to run bytecode and needs to be installed on the computer, which launches the software. The bytecode itself was created by compiling the Java code with the help of the Java compiler. With the combination of JVM and the system independent bytecode it is possible to run the software on a wide range of operating systems, including but not limited to Windows®, MacOS® and Linux.

As shown in Fig. S- X-1 and Fig. S- X-2 the application's main window was split into an input and output area. The user is able to select a wide range of solvents and references from the left-hand side of the window. The result will be shown on the right side after clicking the "calculate" button.

The program was written with the intention to support multiple languages. The default language setting is English. The program was also translated into German. During start, the program recognizes the locale setting on a user's computer and will automatically switch to the correct language.

As mentioned above you can choose the solvent and used reference within the software. Afterwards enter the measured diffusion coefficient of analyte (x) and reference (ref) as well as a sum formula or molecular weight of your proposed aggregate. You will receive estimated MWs for all ECCs available for your chosen solvent (DSE: dissipated spheres and ellipsoids; ED: enlarged discs; CS: compact spheres; Merge: merged calibration curve using all references; PCS: purely hydrocarbon compounds; NCS: non hydrocarbon compounds) together with the deviation compared to your MW (if a sum formula was entered, this MW will be automatically calculated). You will also receive confirmation, if your entered MW is within the expected empirical and theoretical error limits. If a sum formula was entered, a molar van-der-Waals density will also be calculated (based on a predefined list with van-der-Waals volumes of the elements, if no van-der-Waals volume is known, no molecular density will be calculated) for this compound. After estimation, saving or printing your results will also be possible, whereas copying your results is always a possibility.

Alongside with the download we offer the source code of the program, if you are interested. Please write an email to the author for receiving a copy. Note that this program may be subject to changes as it will be improved as deemed necessary.

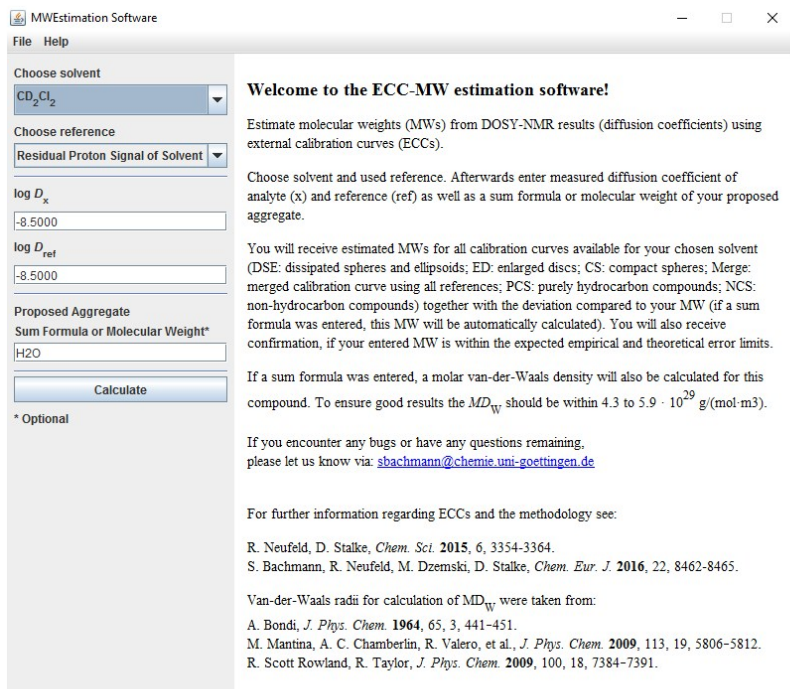

Fig. S- X-1: Screenshot (1) of the ECC-MW estimation software – start screen.

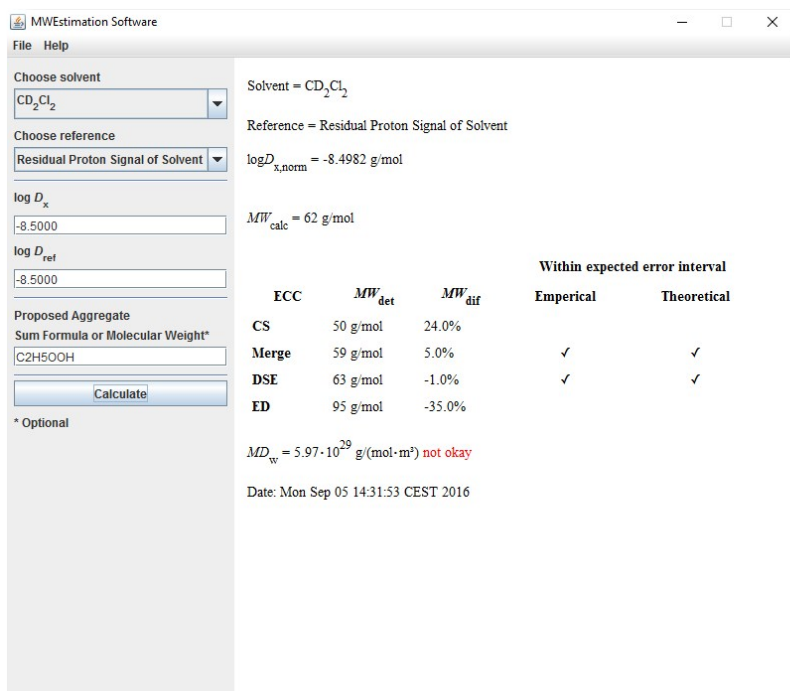

Fig. S- X-2: Screenshot (2) of the ECC-MW estimation software – after estimation.

## XI. References

1. R. Neufeld and D. Stalke, *Chem. Sci.*, 2015, **6**, 3354-3364.
2. R. Neufeld, M. John and D. Stalke, *Angew. Chem.*, 2015, **127**, 7100-7104, *Angew. Chem. Int. Ed.*, 2015, **54**, 6994-6998.
3. W. Schlenk and J. Holtz, *Ber. d. chem. Ges.*, 1917, **50**, 262-274.
4. W. G. Kofron and L. M. Baclawski, *J. Org. Chem.*, 1976, **41**, 1879-1880.
5. R. E. Dinnebier, U. Behrens and F. Olbrich, *Organometallics*, 1997, **16**, 3855-3858.
6. B. O. Wagner and H. F. Ebel, *Tetrahedron*, 1970, **26**, 5155-5167.
7. L. A. Paquette, W. Bauer, M. R. Sivik, M. Bühl, M. Feigel and P. v. R. Schleyer, *J. Am. Chem. Soc.*, 1990, **112**, 8776-8789.
8. A. Bondi, *J. Phys. Chem.*, 1964, **68**, 441-451.
